# Supplementary material for: Antitumor Effect of Regorafenib on MicroRNA Expression in Hepatocellular Carcinoma Cell Lines
Source: MDPI journal article supplement (doi:10.3390/ijms23031667), 2022-01-31
Supplement: s1 [file s1]

Supplementary Materials

# Antitumor Effect of Regorafenib on MicroRNA Expression in Hepatocellular Carcinoma Cell Lines

Kei Takuma <sup>1</sup>, Shintaro Fujihara <sup>1</sup>, Koji Fujita <sup>1</sup>, Hisakazu Iwama <sup>2</sup>, Mai Nakahara <sup>1</sup>, Kyoko Oura <sup>1</sup>, Tomoko Tadokoro <sup>1</sup>, Shima Mimura <sup>1</sup>, Joji Tani <sup>1</sup>, Tingting Shi <sup>1</sup>, Asahiro Morishita <sup>1</sup>, Hideki Kobara <sup>1</sup>, Takashi Himoto <sup>1</sup> and Tsutomu Masaki <sup>1,\*</sup>

<sup>1</sup> Department of Gastroenterology and Neurology, Faculty of Medicine, Graduate School of Medicine, Kagawa University, 1750-1 Ikenobe, Miki-cho, Kita-gun, Kagawa 761-0793, Japan; takuma.kei@kagawa-u.ac.jp (K.T.); fujihara.shintaro@kagawa-u.ac.jp (S.F.); fujita.koji@kagawa-u.ac.jp (K.F.); nakahara.mai@kagawa-u.ac.jp (M.N.); oura.kyoko@kagawa-u.ac.jp (K.O.); tadokoro.tomoko@kagawa-u.ac.jp (T.T.); mimura.shima@kagawa-u.ac.jp (S.M.); tani.joji@kagawa-u.ac.jp (J.T.); shi.tingting@kagawa-u.ac.jp (T.S.); morishita.asahiro@kagawa-u.ac.jp (A.M.); kobara.hideki@kagawa-u.ac.jp (H.K.); himoto@chs.pref.kagawa.jp (T.H.)

<sup>2</sup> Life Science Research Center, Kagawa University, 1750-1 Ikenobe, Miki-cho, Kita-gun, Kagawa 761-0793, Japan; iwama.hisakazu@med.kagawa-u.ac.jp

\* Correspondence: tmasaki@med.kagawa-u.ac.jp; Tel.: +81-87-891-2156

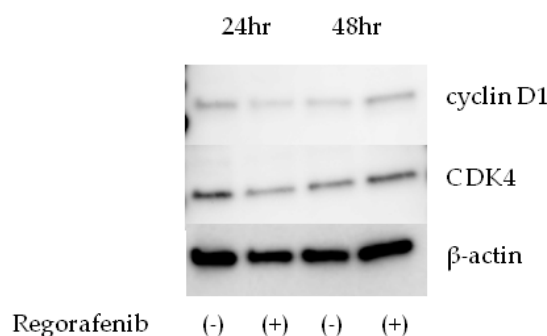

**Figure S1.** Western blot showing the expression of cyclin D1 and CDK4 in PLC/PRF/5 cells at 24 h and 48 h after the addition of 5  $\mu$ M regorafenib.
